# Supplementary material for: Comprehensive Assessment of the Virulence Factors sub 3, sub 6 and mcpA in the Zoonotic Dermatophyte Trichophyton benhamiae Using FISH and qPCR
Source: MDPI journal article supplement (doi:10.3390/jof8010024), 2021-12-28
Supplement: s1 [file s1]

## Supplementary Materials:

**Table S1.** Further information on *T. benhamiae* isolates used during this study.

| <i>T. benhamiae</i> isolate | source <sup>a</sup> | phenotypic appearance<br>(Sabouraud agar, 15 d, 28 °C) |                       | ITS type<br>(NCBI acc. no.) <sup>a</sup> | mating type [27] |
|-----------------------------|---------------------|--------------------------------------------------------|-----------------------|------------------------------------------|------------------|
|                             |                     | obverse                                                | reverse               |                                          |                  |
| 205848                      | hum                 | white with yellow rim, furrowed                        | yellow, furrowed      | yellow<br>(KU257464.1)                   | mt -             |
| 205815                      | hum                 | white with yellow rim, furrowed                        | yellow, furrowed      |                                          |                  |
| 205850                      | hum                 | white with yellow rim, furrowed                        | yellow, furrowed      |                                          |                  |
| 206139                      | hum                 | white, radial                                          | beige, velvety        |                                          |                  |
| 207002                      | hum                 | white, powdery                                         | beige-brown, velvety  |                                          |                  |
| 207413                      | hum                 | white, powdery                                         | yellow, velvety       |                                          |                  |
| 205858                      | hum                 | white, radial                                          | yellow with white rim |                                          |                  |
| 206785                      | hum                 | white with yellow rim, furrowed, radial                | yellow, furrowed      |                                          |                  |
| 207860                      | hum                 | white, powdery                                         | yellow, velvety       |                                          |                  |
| 206494                      | hum                 | white, radial                                          | yellow with white rim |                                          |                  |
| 7A                          | Gp                  | white with yellow rim                                  | yellow                |                                          |                  |
| 12A                         | Gp                  | white, powdery                                         | white-beige, velvety  |                                          |                  |
| 15B                         | Gp                  | white with yellow rim                                  | yellow, furrowed      |                                          |                  |
| 1A                          | Gp                  | white with yellow rim                                  | yellow                |                                          |                  |
| 2A                          | Gp                  | white with yellow rim                                  | yellow                |                                          |                  |
| 5A                          | Gp                  | white with yellow rim                                  | yellow                |                                          |                  |
| 14A                         | Gp                  | white with yellow rim                                  | yellow                |                                          |                  |
| 8A                          | Gp                  | white with yellow rim                                  | yellow                |                                          |                  |
| 3A                          | Gp                  | white with yellow rim                                  | yellow                |                                          |                  |
| 6A                          | Gp                  | white with yellow rim<br>(white, radial)               | yellow                | white<br>(LN874022.1)                    |                  |

<sup>a</sup> Human-derived (hum) isolates were obtained from patients of the Laboratory of Medical Microbiology (Moelbis, Germany) with informed consent. Isolates of Guinea pig origin (Gp) were collected at a local zoological garden from feed animals as part of a previous project to develop a dermatophyte biobank. All samples were taken according to local ethical guidelines and state law.

**Table S2.** Name, sequence and further information on the primers used for PCR and qPCR during this study.

| use                                   | target gene                      | primer    | sequence (5'-3')            | Tm [C°] | amplicon [bp] | ref. |
|---------------------------------------|----------------------------------|-----------|-----------------------------|---------|---------------|------|
| Identification                        | ITS 1, 5.8 S rRNA and ITS 2      | LSU266    | GCATTCCCAAACAACCTCGACTC     | 61.5    | ca. 1000      | [26] |
|                                       |                                  | V9G       | TTACGTCCCTGCCCTTTGTA        | 58.1    |               |      |
| Screening for mt+                     | HMG partial                      | MF1       | ATGGCCACTACTTCTGGGACC       | 63.7    | 307           | [27] |
|                                       |                                  | MF2       | CATTGGTAAAACAGCAGCCCC       | 61.5    |               |      |
| Screening for mt-                     | $\alpha$ -Box partial            | MF3       | AAAATGTCTGGCACC GAAGTCTC    | 62.2    | 380           |      |
|                                       |                                  | MF4       | TCTGGGAGAGATCGGGAAACGC      | 66.4    |               |      |
| expression rates of virulence factors | <i>isocitrate lyase</i>          | isol-f    | TGGAAAGATTCAAGATGGCGATA     | 58.6    | 103           | [30] |
|                                       |                                  | isol-rev  | TCTGTGCATTTGATGGGTAATCA     | 58.7    |               |      |
|                                       | <i>subtilisin 3</i>              | sub3-f    | CATGCTTGCCCAGGGTGTTAG       | 63.0    | 81            | [5]  |
|                                       |                                  | sub3-rev  | CCTGGGTTGCGGATAACG          | 58.7    |               |      |
|                                       | <i>subtilisin 6</i>              | sub6-f    | GCGGCAGCACTGATACTCTCT       | 62.7    | 121           |      |
|                                       |                                  | sub6-rev  | TTGCCCAATCCGATGAGGTA        | 58.3    |               |      |
|                                       | <i>metallocarbxy peptidase A</i> | mcpA-f    | GCATTGAAGGCGGTGCAT          | 57.9    | 84            | [30] |
|                                       |                                  | mcpA-rev  | GTCAACACTGTCTCCATTA ACTTGGT | 61.4    |               |      |
| Reference gene for normalization      | <i>ADP-ribosylation factor</i>   | ADPrf-f   | CAGAGAAGAGTTGCAAAAGATGCT    | 59.5    | 74            | [30] |
|                                       |                                  | ADPrf-rev | TGCTTGTTGGCGAAAACGA         | 57.8    |               |      |

**Table S3.** The expression rates of the different virulence factors found in human derived *T. benhamiae* isolates were compared (P values; statistically significant differences are defined as  $P < 0.05$  and indicated in bold letters).

| Sampling day | human derived <i>T. benhamiae</i> isolates |                                 |                                 |                                 |                                 |                                |
|--------------|--------------------------------------------|---------------------------------|---------------------------------|---------------------------------|---------------------------------|--------------------------------|
|              | <i>sub 3</i> vs.<br><i>sub 6</i>           | <i>sub 3</i> vs.<br><i>mcpA</i> | <i>sub 3</i> vs.<br><i>isol</i> | <i>sub 6</i> vs.<br><i>mcpA</i> | <i>sub 6</i> vs.<br><i>isol</i> | <i>mcpA</i> vs.<br><i>isol</i> |
| 3 (n = 3)    | 1,000                                      | 0,4                             | 1                               | 0,4                             | 0,7                             | 0,7                            |
| 5 (n = 5)    | 0,222                                      | 0,151                           | 0,151                           | 1                               | 1                               | 0,841                          |
| 7 (n = 6)    | <b>0,004</b>                               | 0,065                           | <b>0,015</b>                    | 0,937                           | 0,589                           | 0,937                          |
| 10 (n = 4)   | <b>0,029</b>                               | 0,057                           | <b>0,029</b>                    | <b>0,029</b>                    | <b>0,019</b>                    | <b>0,029</b>                   |

**Table S4.** The transcript numbers of the different virulence factors expressed by Gp derived *T. benhamiae* isolates were compared (P values; statistically significant differences are defined as  $P < 0.05$  and indicated in bold letters).

| Sampling day | Gp derived <i>T. benhamiae</i> isolates |                                 |                                 |                                 |                                 |                                |
|--------------|-----------------------------------------|---------------------------------|---------------------------------|---------------------------------|---------------------------------|--------------------------------|
|              | <i>sub 3</i> vs.<br><i>sub 6</i>        | <i>sub 3</i> vs.<br><i>mcpA</i> | <i>sub 3</i> vs.<br><i>isol</i> | <i>sub 6</i> vs.<br><i>mcpA</i> | <i>sub 6</i> vs.<br><i>isol</i> | <i>mcpA</i> vs.<br><i>isol</i> |
| 3 (n = 3)    | 0,700                                   | 0,1                             | 0,1                             | 1                               | 1                               | 1                              |
| 5 (n = 6)    | 0,093                                   | 0,24                            | 0,31                            | 0,589                           | 0,818                           | 0,937                          |
| 7 (n = 7)    | <b>&lt;0,001</b>                        | <b>0,017</b>                    | <b>0,007</b>                    | <b>0,002</b>                    | 0,209                           | 0,165                          |
| 10 (n = 7)   | <b>&lt;0,001</b>                        | <b>&lt;0,001</b>                | <b>&lt;0,001</b>                | <b>&lt;0,001</b>                | 0,209                           | <b>&lt;0,001</b>               |

**Table S5.** The expression rates of the different virulence factors produced by *T. benhamiae* isolates were compared (P values; statistically significant differences are defined as P < 0.05 and indicated in bold letters).

| Sampling day | <i>T. benhamiae</i> isolates (hum and Gp derived) |                                 |                                 |                                 |                                 |                                |
|--------------|---------------------------------------------------|---------------------------------|---------------------------------|---------------------------------|---------------------------------|--------------------------------|
|              | <i>sub 3</i> vs.<br><i>sub 6</i>                  | <i>sub 3</i> vs.<br><i>mcpA</i> | <i>sub 3</i> vs.<br><i>isol</i> | <i>sub 6</i> vs.<br><i>mcpA</i> | <i>sub 6</i> vs.<br><i>isol</i> | <i>mcpA</i> vs.<br><i>isol</i> |
| 3 (n = 6)    | 0,94                                              | 0,18                            | 0,132                           | 0,485                           | 0,937                           | 0,937                          |
| 5 (n = 11)   | <b>0,02</b>                                       | <b>0,049</b>                    | <b>0,049</b>                    | 0,694                           | 0,743                           | 0,844                          |
| 7 (n = 13)   | <b>&lt;0,001</b>                                  | <b>0,004</b>                    | <b>&lt;0,001</b>                | <b>0,013</b>                    | 0,182                           | 0,218                          |
| 10 (n = 11)  | <b>&lt;0,001</b>                                  | <b>&lt;0,001</b>                | <b>&lt;0,001</b>                | <b>&lt;0,001</b>                | 0,511                           | <b>&lt;0,001</b>               |
